# Supplementary material for: Towards higher electrochemical stability of electrolytes: lithium salt design through in silico screening
Source: Royal Society of Chemistry journal article supplement (doi:10.1039/d2ta01259f), 2022-01-01
Supplement: d2ta01259f1.pdf [file d2ta01259f1.pdf]

## Towards higher electrochemical stability of electrolytes: lithium salt design through *in silico* screening

Dale A. Osborne,<sup>a</sup> Michael Breedon,<sup>b</sup> Thomas Rüter,<sup>c</sup> and Michelle J.S. Spencer<sup>\*,a,d</sup>

*a) School of Science, RMIT University, GPO Box 2476, Melbourne, Victoria 3001, Australia.*

*b) CSIRO Manufacturing, Private Bag 10, Clayton South, Victoria 3169, Australia.*

*c) CSIRO Energy, Private Bag 10, Clayton South, Victoria 3169, Australia*

*d) ARC Centre of Excellence in Future Low-Energy Electronics Technologies, School of Science, RMIT University, Melbourne, Victoria 3001, Australia*

## Electronic Supplementary Information

**Table S1** – List of abbreviations for anion structures investigated in this study.

| Abbreviation   | Chemical Name                                                                                            |
|----------------|----------------------------------------------------------------------------------------------------------|
| R <sub>1</sub> | TFSI bis(trifluoromethyl)sulfonyl)imide                                                                  |
| R <sub>2</sub> | FSI bis(fluorosulfonyl)imide                                                                             |
| R <sub>3</sub> | FTFSI (fluorosulfonyl)((trifluoromethyl)sulfonyl)imide                                                   |
| S <sub>1</sub> | MSI bis(methylsulfonyl)imide                                                                             |
| S <sub>2</sub> | ESI bis(ethylsulfonyl)imide                                                                              |
| S <sub>3</sub> | BETI bis((perfluoroethyl)sulfonyl)imide                                                                  |
| S <sub>4</sub> | TFESI bis((2,2,2-trifluoroethyl)sulfonyl)imide                                                           |
| S <sub>5</sub> | TbSI bis(tert-butylsulfonyl)imide                                                                        |
| S <sub>6</sub> | NFSI bis((1,1,1,3,3,3-hexafluoro-2-(trifluoromethyl)propan-2-yl)sulfonyl)imide                           |
| S <sub>7</sub> | CSI bis(cyanosulfonyl)imide                                                                              |
| S <sub>8</sub> | CmSI bis(cyanomethyl)sulfonyl)imide                                                                      |
| S <sub>9</sub> | MOSI bis(methoxysulfonyl)imide                                                                           |
| A <sub>1</sub> | HMSI (hydrosulfonyl)(methylsulfonyl)imide                                                                |
| A <sub>2</sub> | FMSI (fluorosulfonyl)(methylsulfonyl)imide                                                               |
| A <sub>3</sub> | HESI (ethylsulfonyl)(hydrosulfonyl)imide                                                                 |
| A <sub>4</sub> | MESI (ethylsulfonyl)(methylsulfonyl)imide                                                                |
| A <sub>5</sub> | FPFESI (fluorosulfonyl)((perfluoroethyl)sulfonyl)imide                                                   |
| A <sub>6</sub> | MTbSI (tert-butylsulfonyl)(methylsulfonyl)imide                                                          |
| A <sub>7</sub> | TFNFSI ((1,1,1,3,3,3-hexafluoro-2-(trifluoromethyl)propan-2-yl)sulfonyl)((trifluoromethyl)sulfonyl)imide |
| A <sub>8</sub> | FCSI (cyanosulfonyl)(fluorosulfonyl)imide                                                                |
| A <sub>9</sub> | TFCSI (cyanosulfonyl)((trifluoromethyl)sulfonyl)imide                                                    |

**Table S2** – Anion natural charge for each atom of the sulfonyl core, and sum of the charges for each functional group, calculated from the M06-2X/6-311\*\*G(2d,p) geometry.

|                |          | N     | S <sub>1</sub> | S <sub>2</sub> | O <sub>1</sub> | O <sub>2</sub> | O <sub>3</sub> | O <sub>4</sub> | R'    | R''   |
|----------------|----------|-------|----------------|----------------|----------------|----------------|----------------|----------------|-------|-------|
|                |          |       |                |                |                | (e)            |                |                |       |       |
| R <sub>1</sub> | LiTFSI   | -1.26 | 2.27           | 2.27           | -0.97          | -0.97          | -0.96          | -0.96          | -0.22 | -0.22 |
| R <sub>2</sub> | LiFSI    | -1.23 | 2.56           | 2.56           | -0.96          | -0.96          | -0.95          | -0.95          | -0.53 | -0.53 |
| R <sub>3</sub> | LIFTFSI  | -1.24 | 2.27           | 2.56           | -0.96          | -0.97          | -0.95          | -0.96          | -0.53 | -0.22 |
| S <sub>1</sub> | LIMSI    | -1.26 | 2.32           | 2.32           | -1.03          | -1.03          | -1.01          | -1.01          | -0.15 | -0.15 |
| S <sub>2</sub> | LiESI    | -1.26 | 2.33           | 2.33           | -1.01          | -1.01          | -1.03          | -1.04          | -0.15 | -0.15 |
| S <sub>3</sub> | LiBETI   | -1.25 | 2.30           | 2.30           | -0.96          | -0.96          | -0.96          | -0.96          | -0.26 | -0.26 |
| S <sub>4</sub> | LiTFESI  | -1.26 | 2.34           | 2.34           | -0.98          | -0.98          | -1.01          | -1.01          | -0.22 | -0.22 |
| S <sub>5</sub> | LiTbSI   | -1.30 | 2.35           | 2.35           | -1.01          | -1.01          | -1.02          | -1.02          | -0.17 | -0.17 |
| S <sub>6</sub> | LiNFSI   | -1.28 | 2.40           | 2.40           | -0.96          | -0.96          | -0.94          | -0.94          | -0.36 | -0.36 |
| S <sub>7</sub> | LiCSI    | -1.22 | 2.33           | 2.33           | -0.94          | -0.94          | -0.94          | -0.94          | -0.34 | -0.34 |
| S <sub>8</sub> | LiCmSI   | -1.25 | 2.35           | 2.35           | -0.98          | -0.98          | -1.01          | -1.01          | -0.24 | -0.24 |
| S <sub>9</sub> | LiMOSI   | -1.27 | 2.54           | 2.55           | -0.98          | -0.99          | -0.99          | -0.98          | -0.44 | -0.44 |
| A <sub>1</sub> | LiHMSI   | -1.26 | 2.32           | 2.19           | -1.01          | -1.00          | -1.03          | -1.02          | -0.04 | -0.15 |
| A <sub>2</sub> | LiFMSI   | -1.25 | 2.55           | 2.32           | -0.99          | -1.00          | -0.97          | -1.00          | -0.53 | -0.14 |
| A <sub>3</sub> | LiHESI   | -1.26 | 2.19           | 2.32           | -1.00          | -1.03          | -1.02          | -1.01          | -0.04 | -0.15 |
| A <sub>4</sub> | LiMESI   | -1.26 | 2.33           | 2.32           | -1.01          | -1.01          | -1.03          | -1.03          | -0.15 | -0.15 |
| A <sub>5</sub> | LiPPFESI | -1.24 | 2.56           | 2.30           | -0.95          | -0.96          | -0.95          | -0.96          | -0.53 | -0.26 |
| A <sub>6</sub> | LiMTbSI  | -1.28 | 2.34           | 2.33           | -1.01          | -1.03          | -1.02          | -1.02          | -0.15 | -0.17 |
| A <sub>7</sub> | LiTFNFSI | -1.27 | 2.39           | 2.28           | -0.95          | -0.95          | -0.96          | -0.96          | -0.21 | -0.38 |
| A <sub>8</sub> | LiFCSI   | -1.22 | 2.33           | 2.56           | -0.95          | -0.95          | -0.95          | -0.94          | -0.53 | -0.35 |
| A <sub>9</sub> | LiTFCSI  | -1.23 | 2.33           | 2.26           | -0.96          | -0.95          | -0.96          | -0.94          | -0.20 | -0.35 |

**Table S3** – Lithium salt natural charge for each atom of the sulfonyl core, and sum of the charges for each functional group, calculated from the M06-2X/6-311\*\*G(2d,p) geometry.

|                |          | N     | S <sub>1</sub> | S <sub>2</sub> | O <sub>1</sub> | O <sub>2</sub> | O <sub>3</sub> | O <sub>4</sub> | Li   | R'    | R''   |
|----------------|----------|-------|----------------|----------------|----------------|----------------|----------------|----------------|------|-------|-------|
|                |          |       |                |                |                | (e)            |                |                |      |       |       |
| R <sub>1</sub> | LiTFSI   | -1.24 | 2.28           | 2.28           | -0.90          | -0.90          | -1.09          | -1.09          | 0.95 | -0.14 | -0.14 |
| R <sub>2</sub> | LiFSI    | -1.21 | 2.59           | 2.59           | -0.89          | -0.89          | -1.08          | -1.08          | 0.96 | -0.50 | -0.50 |
| R <sub>3</sub> | LIFTFSI  | -1.22 | 2.27           | 2.59           | -0.89          | -0.90          | -1.08          | -1.10          | 0.95 | -0.49 | -0.14 |
| S <sub>1</sub> | LIMSI    | -1.25 | 2.33           | 2.30           | -0.95          | -0.98          | -1.13          | -1.12          | 0.95 | -0.08 | -0.07 |
| S <sub>2</sub> | LiESI    | -1.25 | 2.33           | 2.30           | -0.95          | -0.99          | -1.13          | -1.12          | 0.95 | -0.08 | -0.06 |
| S <sub>3</sub> | LiBETI   | -1.21 | 2.30           | 2.30           | -0.89          | -0.90          | -1.08          | -1.08          | 0.94 | -0.19 | -0.17 |
| S <sub>4</sub> | LiTFESI  | -1.22 | 2.34           | 2.34           | -0.93          | -0.93          | -1.09          | -1.09          | 0.91 | -0.17 | -0.17 |
| S <sub>5</sub> | LiTbSI   | -1.28 | 2.34           | 2.36           | -0.98          | -0.97          | -1.13          | -1.14          | 0.95 | -0.07 | -0.08 |
| S <sub>6</sub> | LiNFSI   | -1.26 | 2.41           | 2.41           | -0.90          | -0.90          | -1.09          | -1.08          | 0.95 | -0.26 | -0.27 |
| S <sub>7</sub> | LiCSI    | -1.20 | 2.34           | 2.34           | -0.88          | -0.88          | -1.07          | -1.07          | 0.96 | -0.27 | -0.27 |
| S <sub>8</sub> | LiCmSI   | -1.26 | 2.36           | 2.37           | -0.93          | -0.92          | -1.08          | -1.07          | 0.93 | -0.18 | -0.21 |
| S <sub>9</sub> | LiMOSI   | -1.23 | 2.53           | 2.56           | -0.91          | -0.93          | -1.05          | -1.08          | 0.94 | -0.45 | -0.39 |
| A <sub>1</sub> | LiHMSI   | -1.24 | 2.30           | 2.20           | -0.97          | -0.93          | -1.12          | -1.12          | 0.95 | 0.00  | -0.06 |
| A <sub>2</sub> | LiFMSI   | -1.23 | 2.58           | 2.33           | -0.89          | -0.94          | -1.08          | -1.12          | 0.95 | -0.53 | -0.07 |
| A <sub>3</sub> | LiHESI   | -1.24 | 2.20           | 2.30           | -0.93          | -0.98          | -1.12          | -1.12          | 0.95 | 0.00  | -0.06 |
| A <sub>4</sub> | LiMESI   | -1.25 | 2.30           | 2.33           | -0.95          | -0.99          | -1.13          | -1.12          | 0.95 | -0.08 | -0.06 |
| A <sub>5</sub> | LiPPFESI | -1.20 | 2.59           | 2.29           | -0.88          | -0.89          | -1.07          | -1.08          | 0.94 | -0.50 | -0.19 |
| A <sub>6</sub> | LiMTbSI  | -1.25 | 2.32           | 2.34           | -0.95          | -0.99          | -1.13          | -1.12          | 0.95 | -0.09 | -0.06 |
| A <sub>7</sub> | LiTFNFSI | -1.25 | 2.39           | 2.28           | -0.90          | -0.90          | -1.08          | -1.07          | 0.94 | -0.13 | -0.29 |
| A <sub>8</sub> | LiFCSI   | -1.20 | 2.34           | 2.59           | -0.88          | -0.88          | -1.08          | -1.08          | 0.96 | -0.50 | -0.27 |
| A <sub>9</sub> | LiTFCSI  | -1.22 | 2.34           | 2.27           | -0.89          | -0.88          | -1.09          | -1.08          | 0.95 | -0.13 | -0.28 |

**Table S4** – Change in net charges ( $\Delta q$ ) between the most stable anion and Li salt structure.

|              |                |          | N      | S <sub>1</sub> | S <sub>2</sub> | O <sub>1</sub> | O <sub>2</sub><br>(e) | O <sub>3</sub> | O <sub>4</sub> | Li     | R'     | R''   |
|--------------|----------------|----------|--------|----------------|----------------|----------------|-----------------------|----------------|----------------|--------|--------|-------|
| Ref.         | R <sub>1</sub> | LiTFSI   | 0.017  | 0.012          | 0.012          | 0.064          | 0.064                 | -0.138         | -0.138         | -0.046 | 0.076  | 0.076 |
|              | R <sub>2</sub> | LiFSI    | 0.024  | 0.031          | 0.031          | 0.073          | 0.073                 | -0.129         | -0.129         | -0.044 | 0.034  | 0.034 |
|              | R <sub>3</sub> | LiFTFSI  | 0.025  | 0.003          | 0.030          | 0.068          | 0.069                 | -0.132         | -0.134         | -0.046 | 0.036  | 0.081 |
| Symmetrical  | S <sub>1</sub> | LiMSI    | 0.015  | 0.010          | -0.020         | 0.082          | 0.051                 | -0.123         | -0.107         | -0.052 | 0.064  | 0.081 |
|              | S <sub>2</sub> | LiESI    | 0.016  | 0.008          | -0.021         | 0.059          | 0.028                 | -0.102         | -0.089         | -0.053 | 0.068  | 0.086 |
|              | S <sub>3</sub> | LiBETI   | 0.039  | -0.006         | 0.000          | 0.067          | 0.058                 | -0.122         | -0.126         | -0.062 | 0.070  | 0.083 |
|              | S <sub>4</sub> | LiTFESI  | 0.035  | -0.002         | -0.002         | 0.058          | 0.058                 | -0.084         | -0.084         | -0.086 | 0.052  | 0.052 |
|              | S <sub>5</sub> | LiTbSI   | 0.026  | -0.013         | 0.007          | 0.028          | 0.046                 | -0.111         | -0.118         | -0.052 | 0.100  | 0.086 |
|              | S <sub>6</sub> | LiNFSI   | 0.018  | 0.009          | 0.009          | 0.051          | 0.052                 | -0.144         | -0.143         | -0.052 | 0.103  | 0.097 |
|              | S <sub>7</sub> | LiCSI    | 0.020  | 0.015          | 0.015          | 0.059          | 0.059                 | -0.131         | -0.131         | -0.044 | 0.070  | 0.070 |
|              | S <sub>8</sub> | LiCmSI   | -0.009 | 0.017          | 0.021          | 0.048          | 0.054                 | -0.077         | -0.061         | -0.072 | 0.054  | 0.026 |
|              | S <sub>9</sub> | LiMOSI   | 0.039  | -0.009         | 0.016          | 0.068          | 0.063                 | -0.061         | -0.095         | -0.063 | -0.010 | 0.054 |
| Asymmetrical | A <sub>1</sub> | LiHMSI   | 0.018  | -0.019         | 0.012          | 0.036          | 0.067                 | -0.087         | -0.099         | -0.053 | 0.038  | 0.087 |
|              | A <sub>2</sub> | LiFMSI   | 0.019  | 0.023          | 0.009          | 0.094          | 0.059                 | -0.113         | -0.121         | -0.047 | 0.008  | 0.068 |
|              | A <sub>3</sub> | LiHESI   | 0.020  | 0.012          | -0.021         | 0.066          | 0.055                 | -0.100         | -0.110         | -0.054 | 0.037  | 0.095 |
|              | A <sub>4</sub> | LiMESI   | 0.017  | -0.022         | 0.009          | 0.060          | 0.028                 | -0.103         | -0.088         | -0.053 | 0.063  | 0.089 |
|              | A <sub>5</sub> | LiPPFESI | 0.038  | 0.025          | -0.005         | 0.071          | 0.072                 | -0.124         | -0.117         | -0.061 | 0.030  | 0.071 |
|              | A <sub>6</sub> | LiMTbSI  | 0.024  | -0.023         | 0.004          | 0.060          | 0.041                 | -0.117         | -0.106         | -0.053 | 0.062  | 0.107 |
|              | A <sub>7</sub> | LiTFNFSI | 0.021  | 0.001          | -0.002         | 0.045          | 0.043                 | -0.120         | -0.111         | -0.058 | 0.089  | 0.091 |
|              | A <sub>8</sub> | LiFCSI   | 0.020  | 0.011          | 0.031          | 0.071          | 0.065                 | -0.126         | -0.135         | -0.045 | 0.030  | 0.078 |
|              | A <sub>9</sub> | LiTFCSI  | 0.019  | 0.012          | 0.009          | 0.064          | 0.061                 | -0.130         | -0.136         | -0.045 | 0.074  | 0.073 |

**Equation S1** - Calculation of lithium metal theoretical capacity.

$$Q = \frac{(1e \times 96,485.3321 \text{ C.mol}^{-1})}{6.94 \text{ g.mol}^{-1} \times 3.6 \text{ C.mAh}^{-1}} = 3,861.87 \approx 3,860 \text{ mAh.g}^{-1}$$

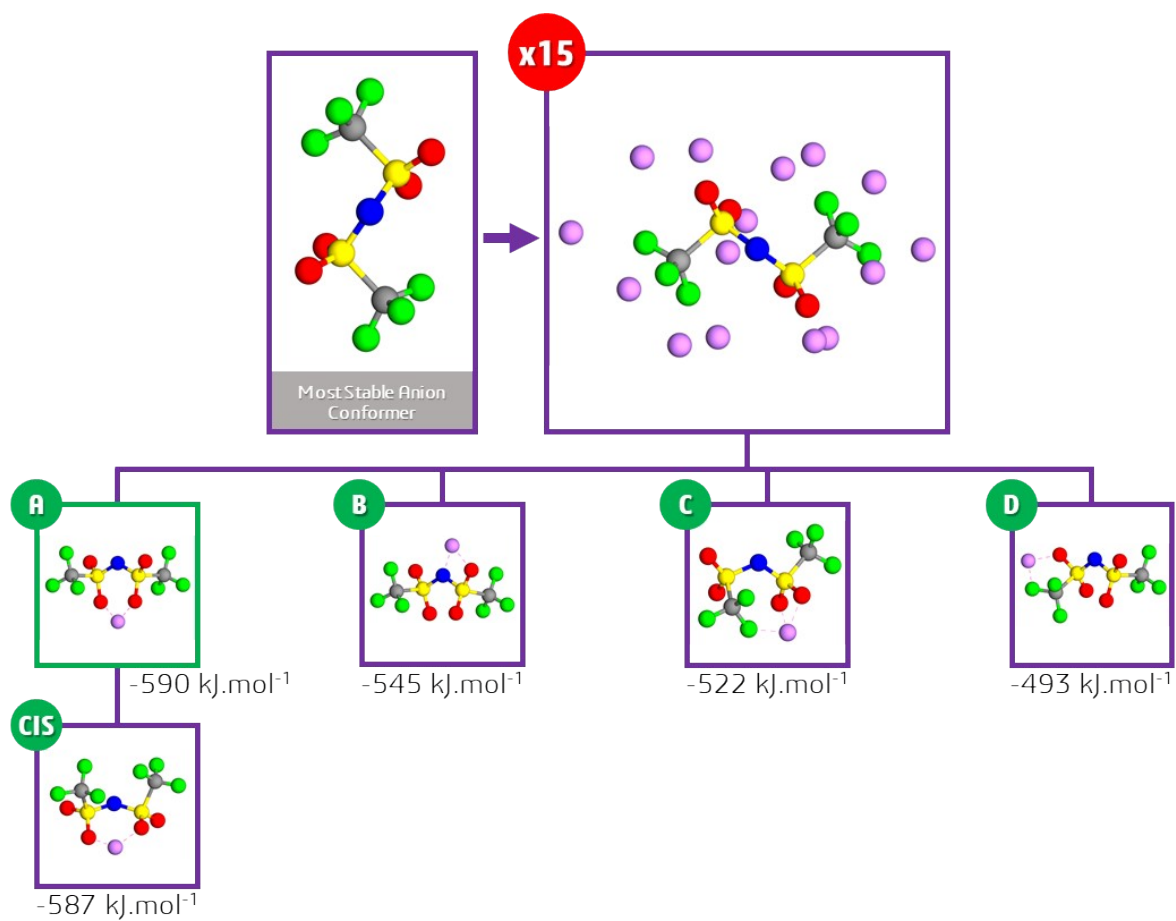

**Figure S1** – Conformer scan and lithiation site screening of  $R_1$  (TFSI<sup>-</sup>), depicting the 5 calculated unique adsorption sites and binding energies. The most stable site is outlined in green.

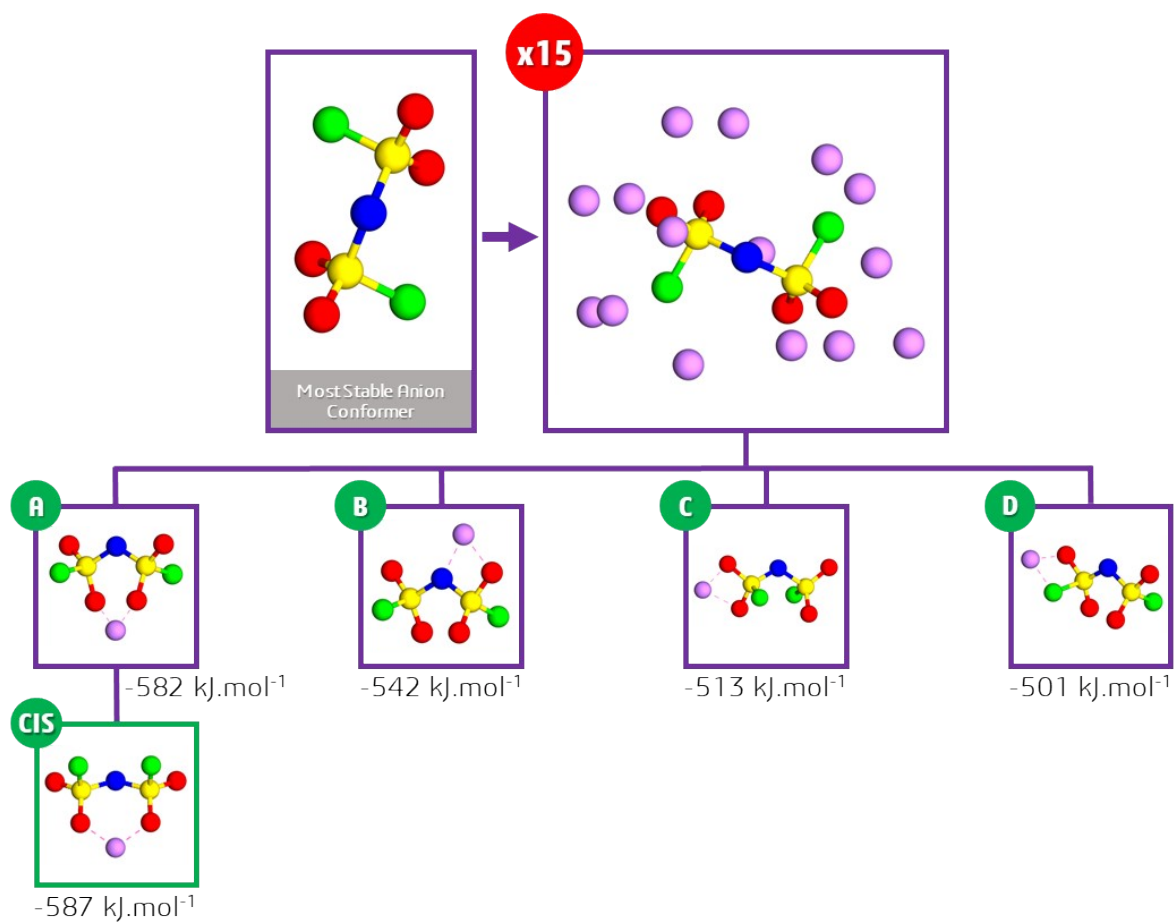

**Figure S2** – Conformer scan and lithiation site screening of R<sub>2</sub> (FSI<sup>-</sup>), depicting the 5 calculated unique adsorption sites and binding energies. The most stable site is highlighted in green.

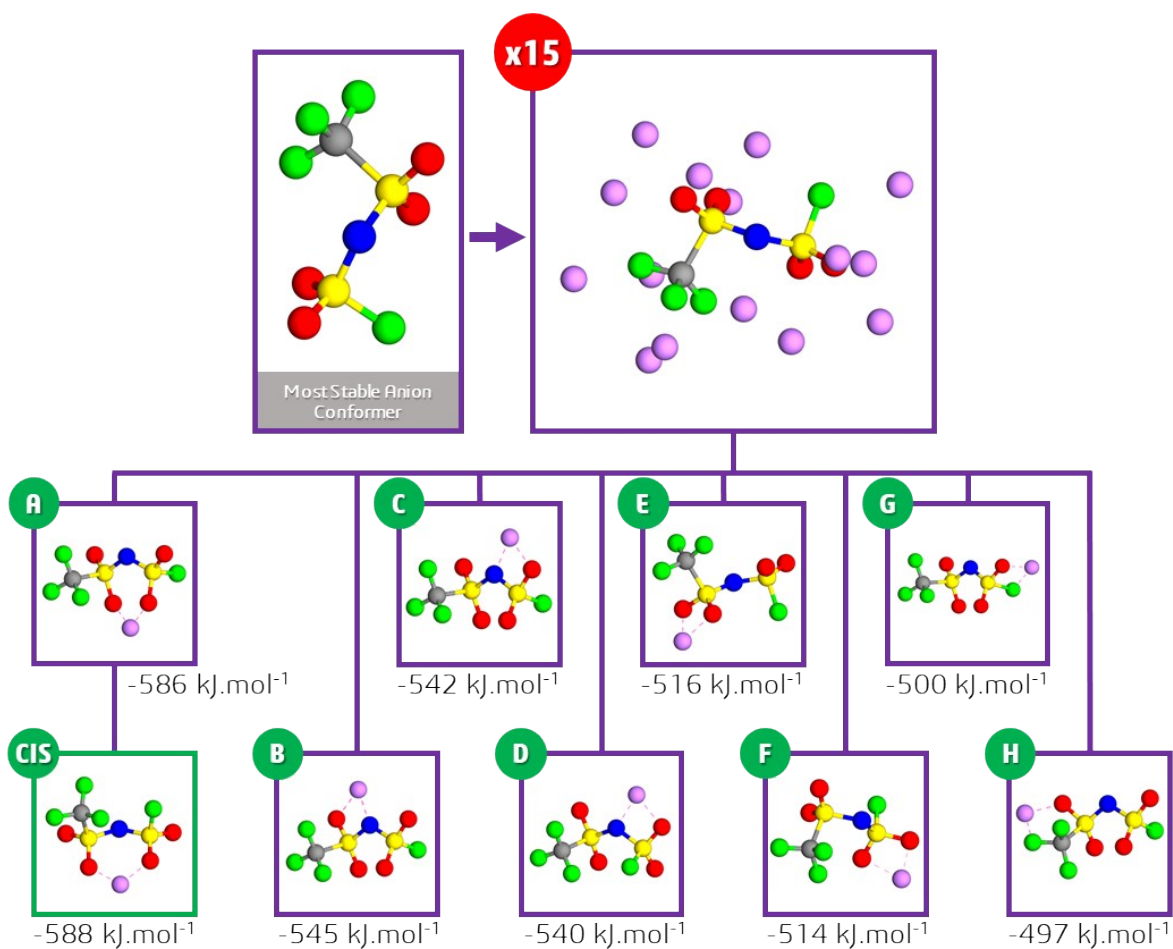

**Figure S3** – Conformer scan and lithiation site screening of R<sub>3</sub> (FTFSI), depicting the 9 calculated unique adsorption sites and binding energies. The most stable site is outlined in green.

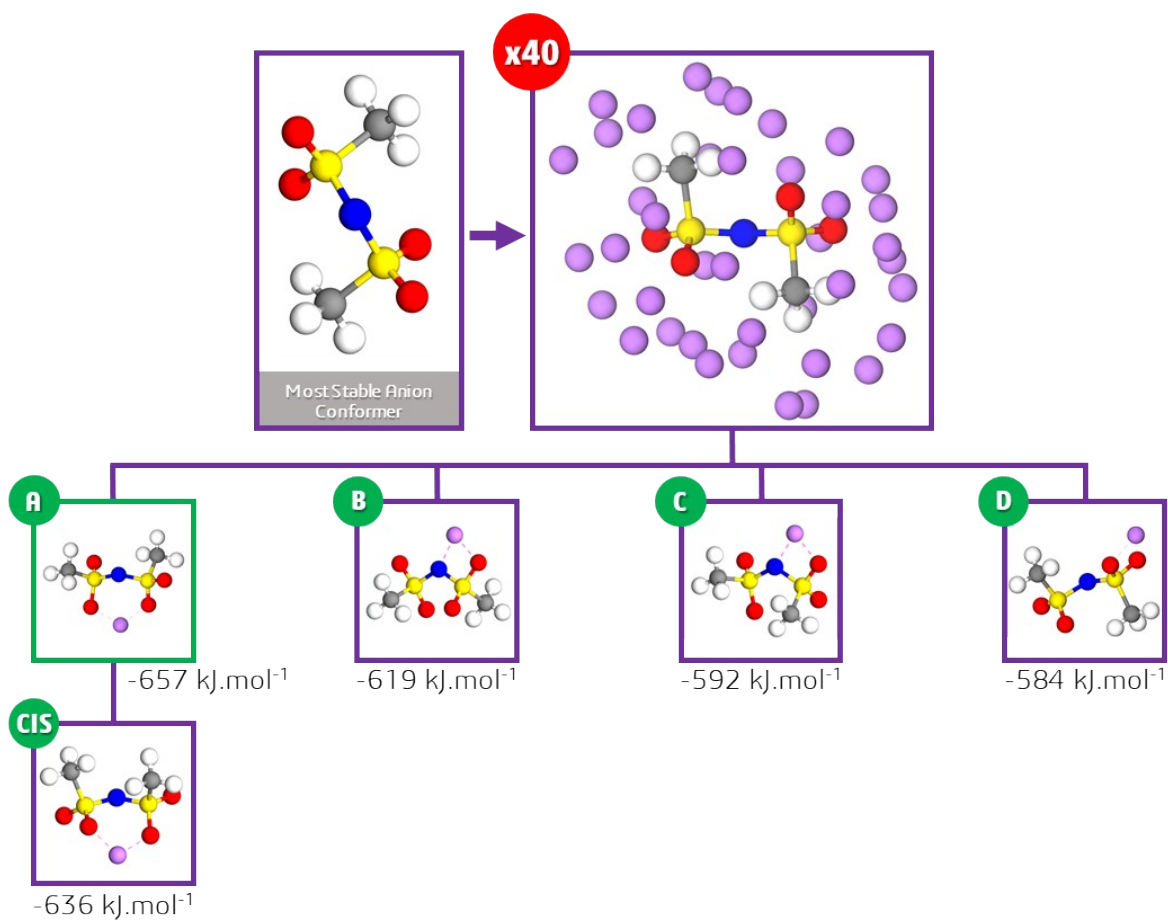

**Figure S4** – Conformer scan and lithiation site screening of  $S_1$  (MSI<sup>-</sup>), depicting the 5 calculated unique adsorption sites and binding energies. The most stable site is outlined in green.



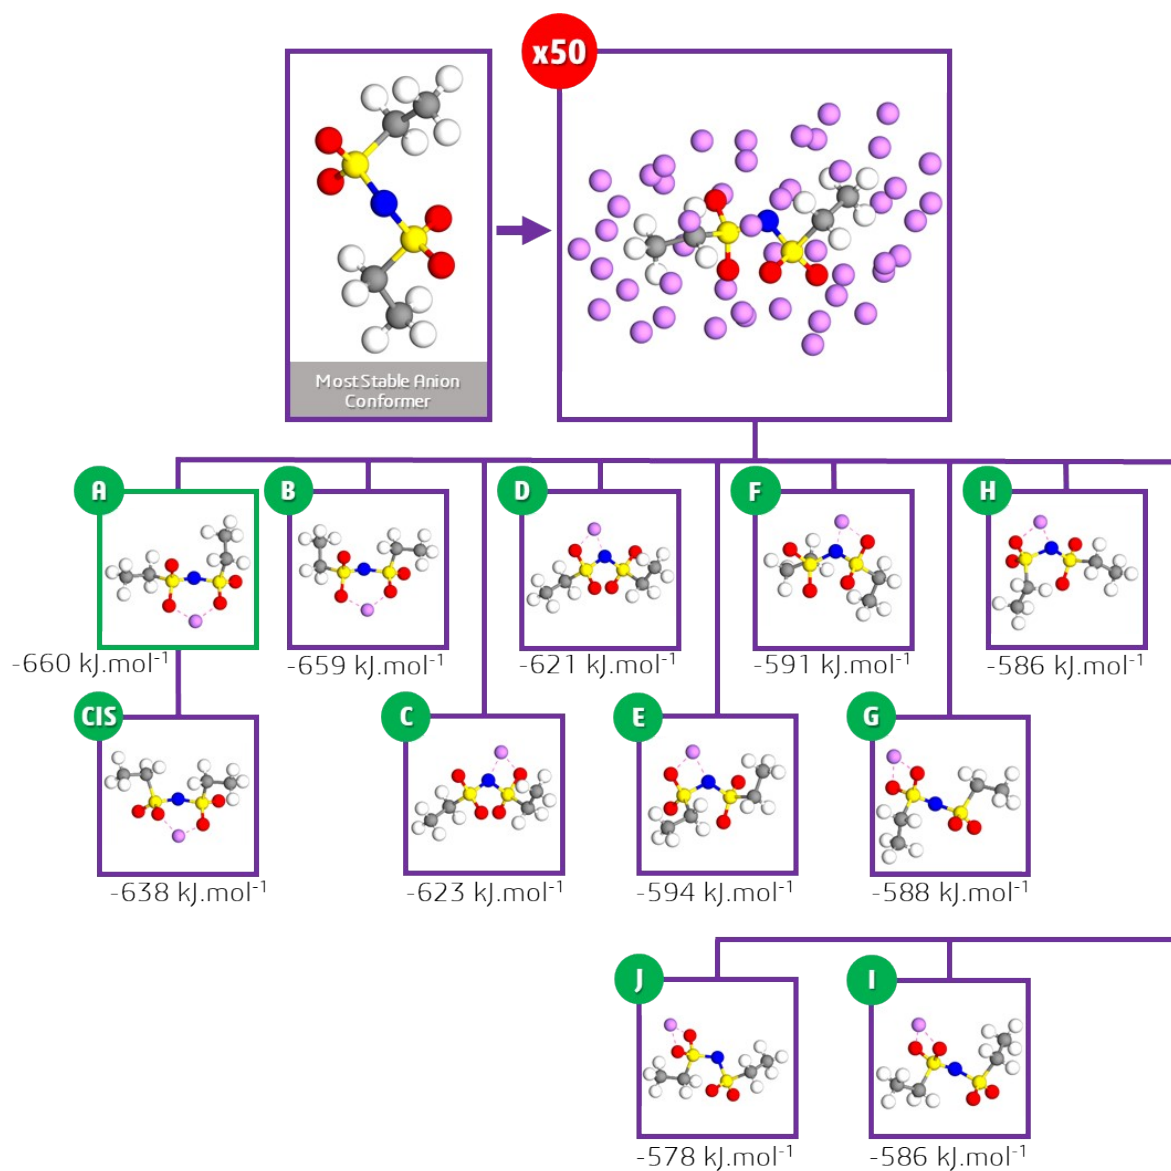

**Figure S5** – Conformer scan and lithiation site screening of S<sub>2</sub> (ESI), depicting the 11 calculated unique adsorption sites and binding energies. The most stable site is outlined in green.

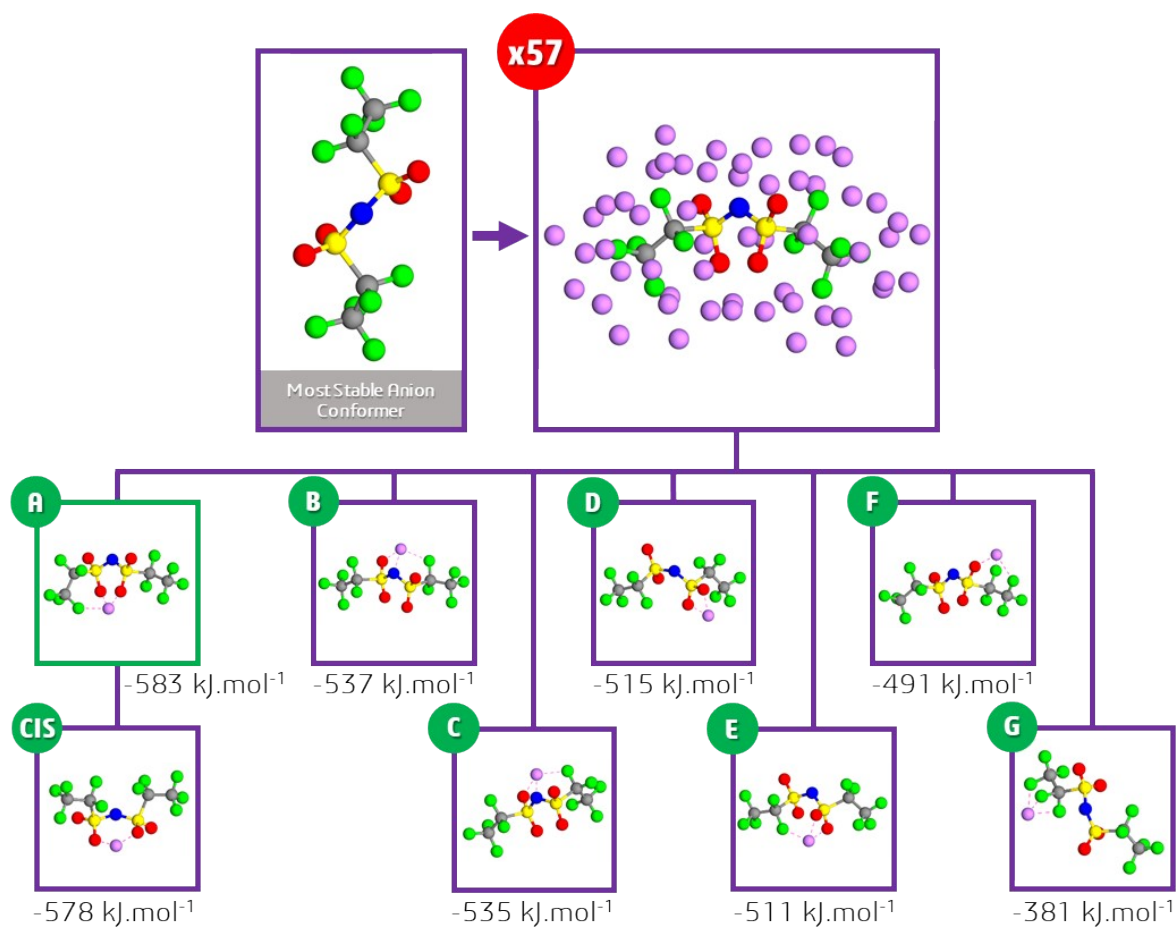

**Figure S6** – Conformer scan and lithiation site screening of S<sub>3</sub> (BET<sup>1-</sup>), depicting the 8 calculated unique adsorption sites and binding energies. The most stable site is outlined in green.

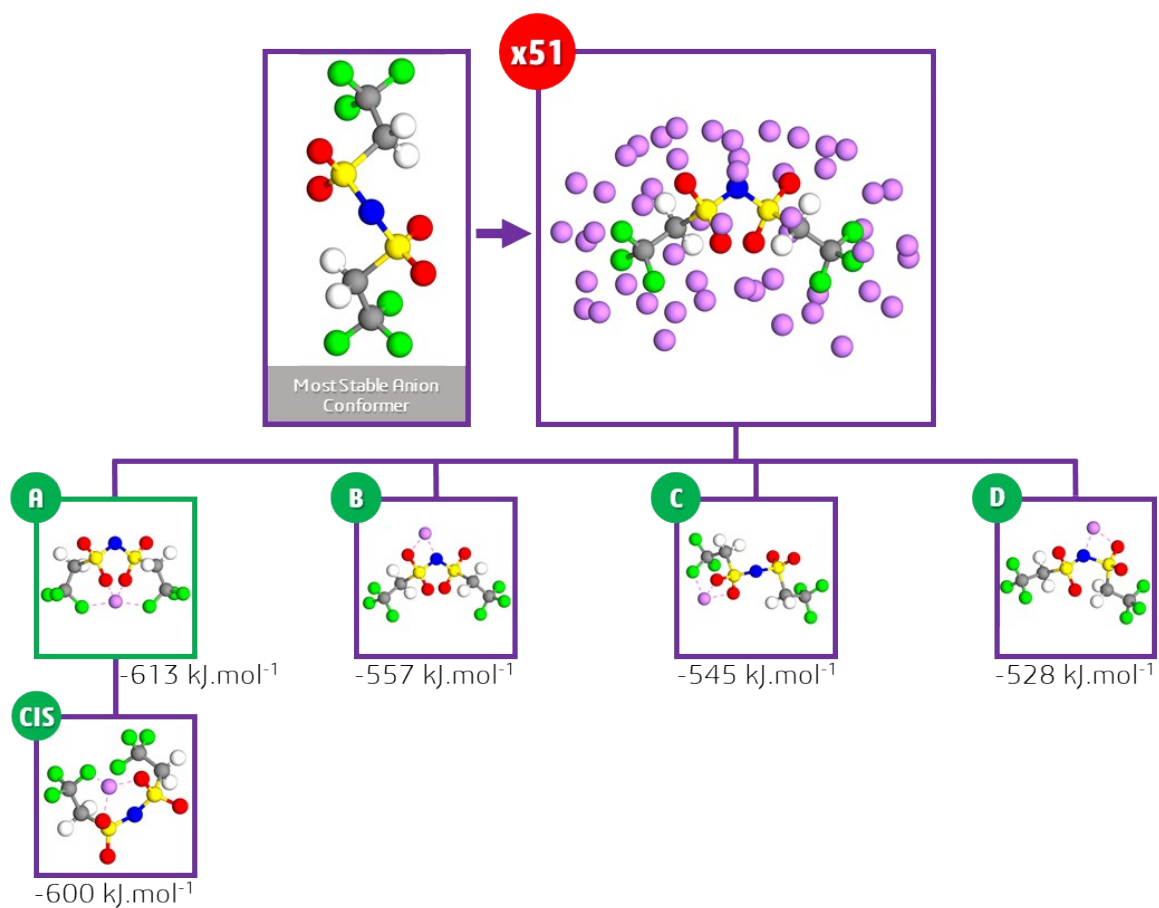

**Figure S7** – Conformer scan and lithiation site screening of S<sub>4</sub> (TFESI), depicting the 5 calculated unique adsorption sites and binding energies. The most stable site is highlighted in green.

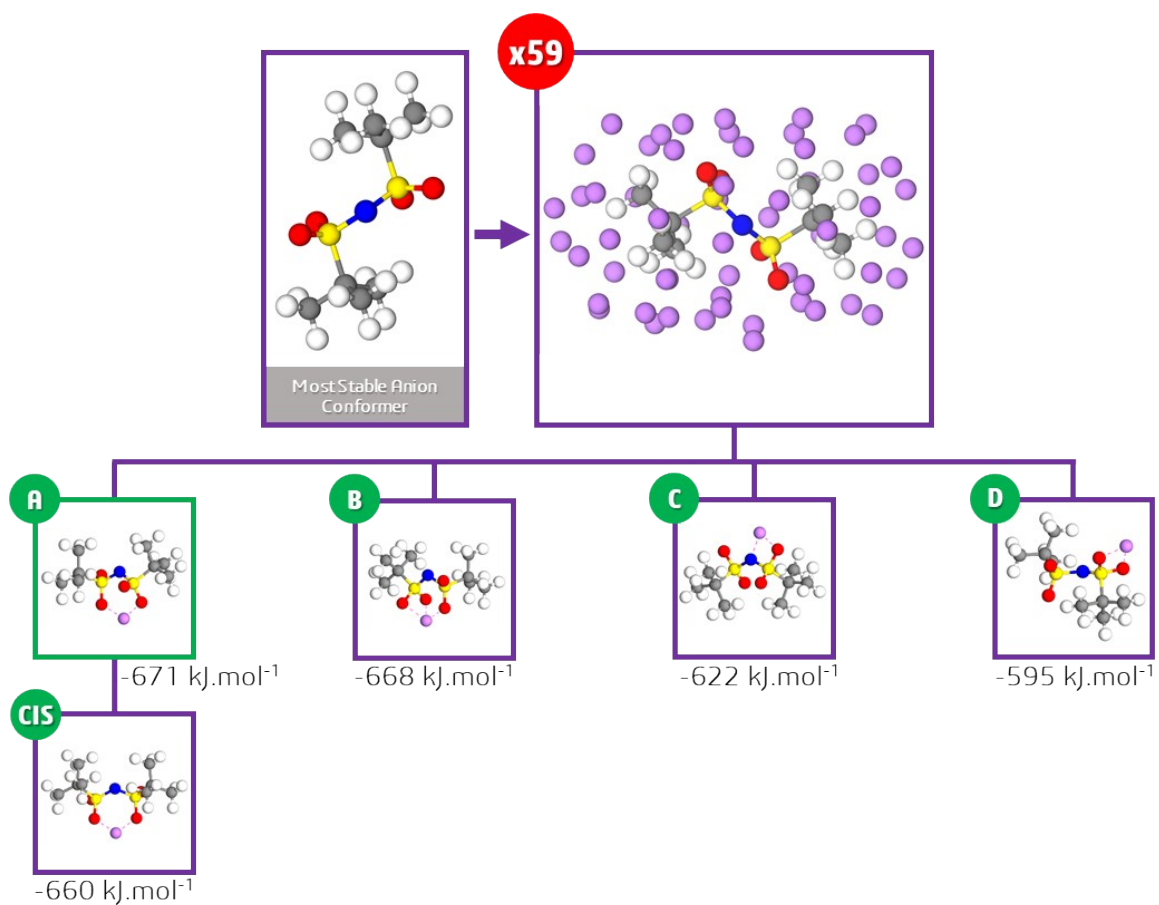

**Figure S8** – Conformer scan and lithiation site screening of S<sub>5</sub> (TbSI), depicting the 5 calculated unique adsorption sites and binding energies. The most stable site is highlighted in green.

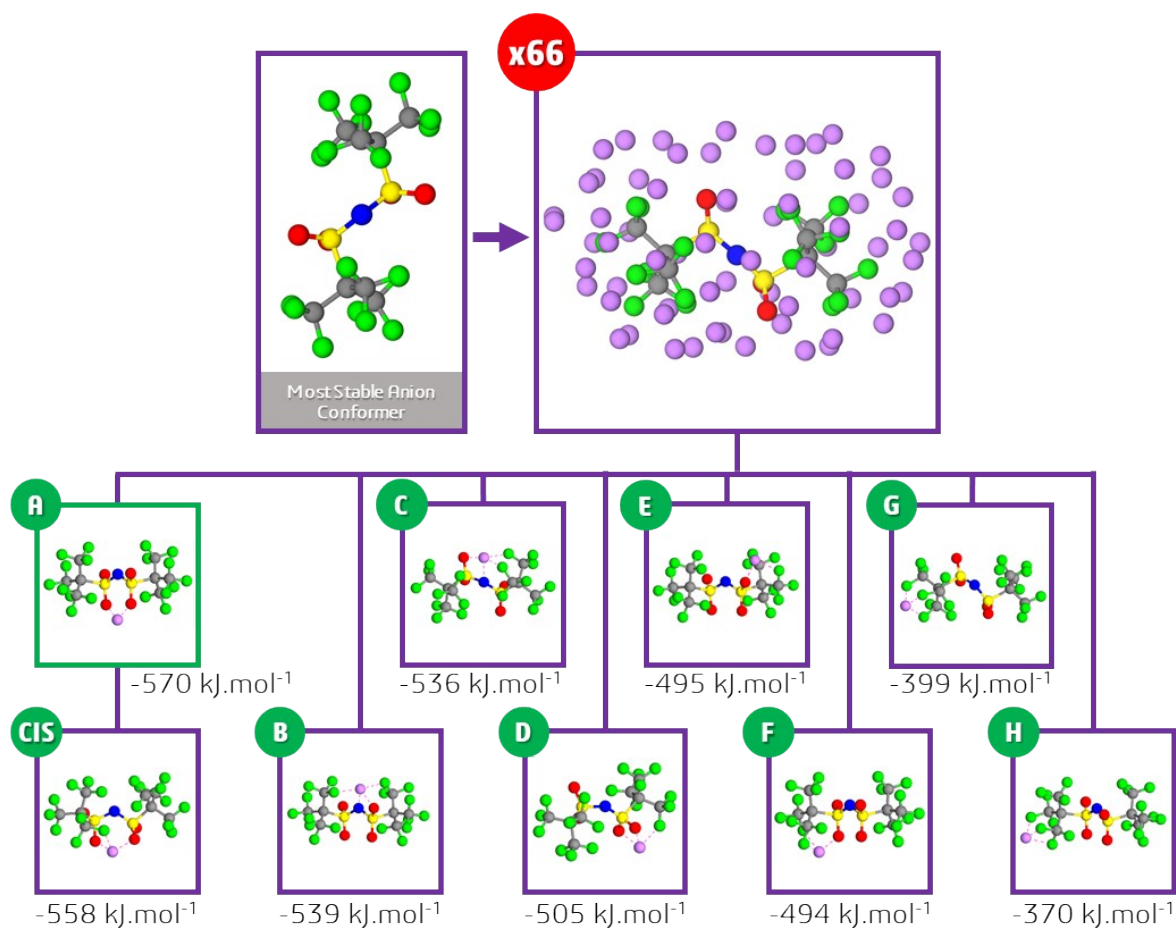

**Figure S9** – Conformer scan and lithiation site screening of  $S_6$  (NFSI), depicting the 9 calculated unique adsorption sites and binding energies. The most stable site is outlined in green.

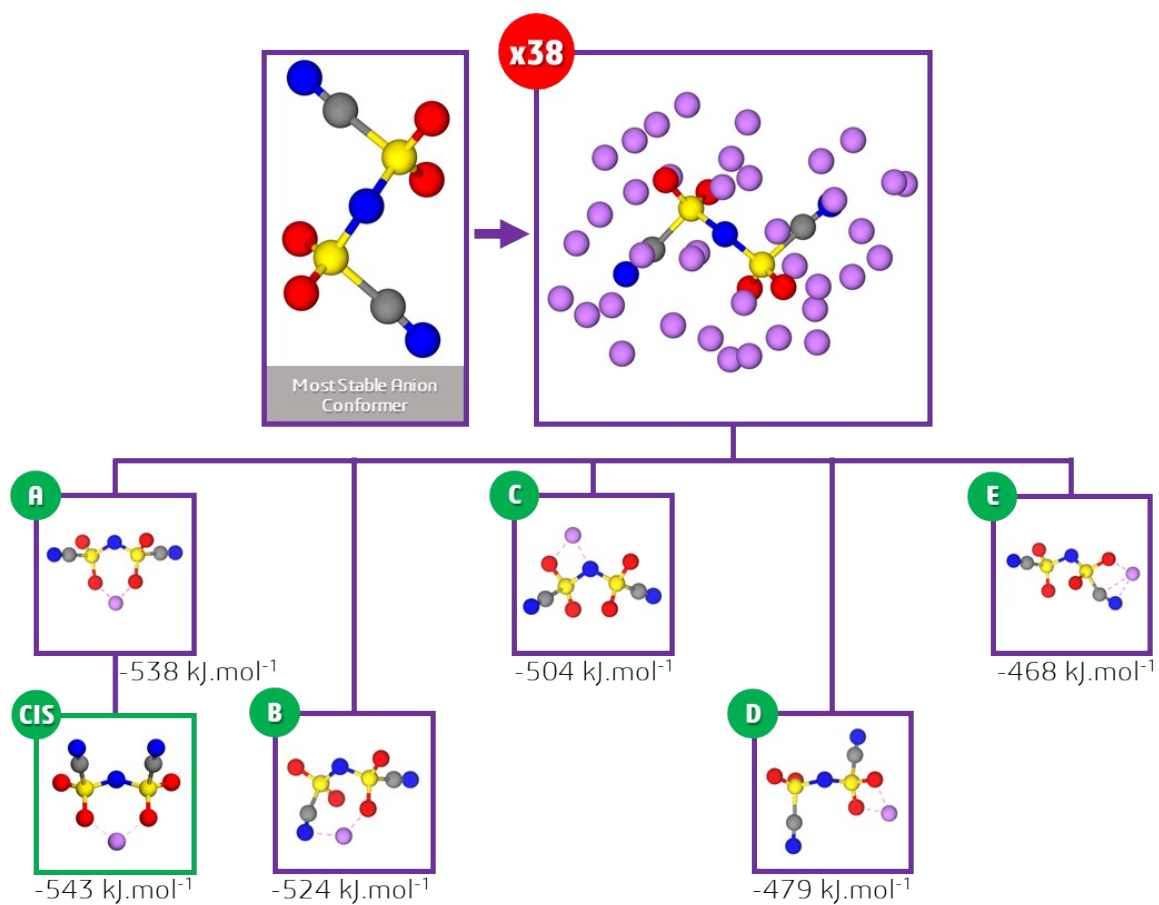

**Figure S10** – Conformer scan and lithiation site screening of  $S_7$  ( $CS_7^-$ ), depicting the 6 calculated unique adsorption sites and binding energies. The most stable site is outlined in green.

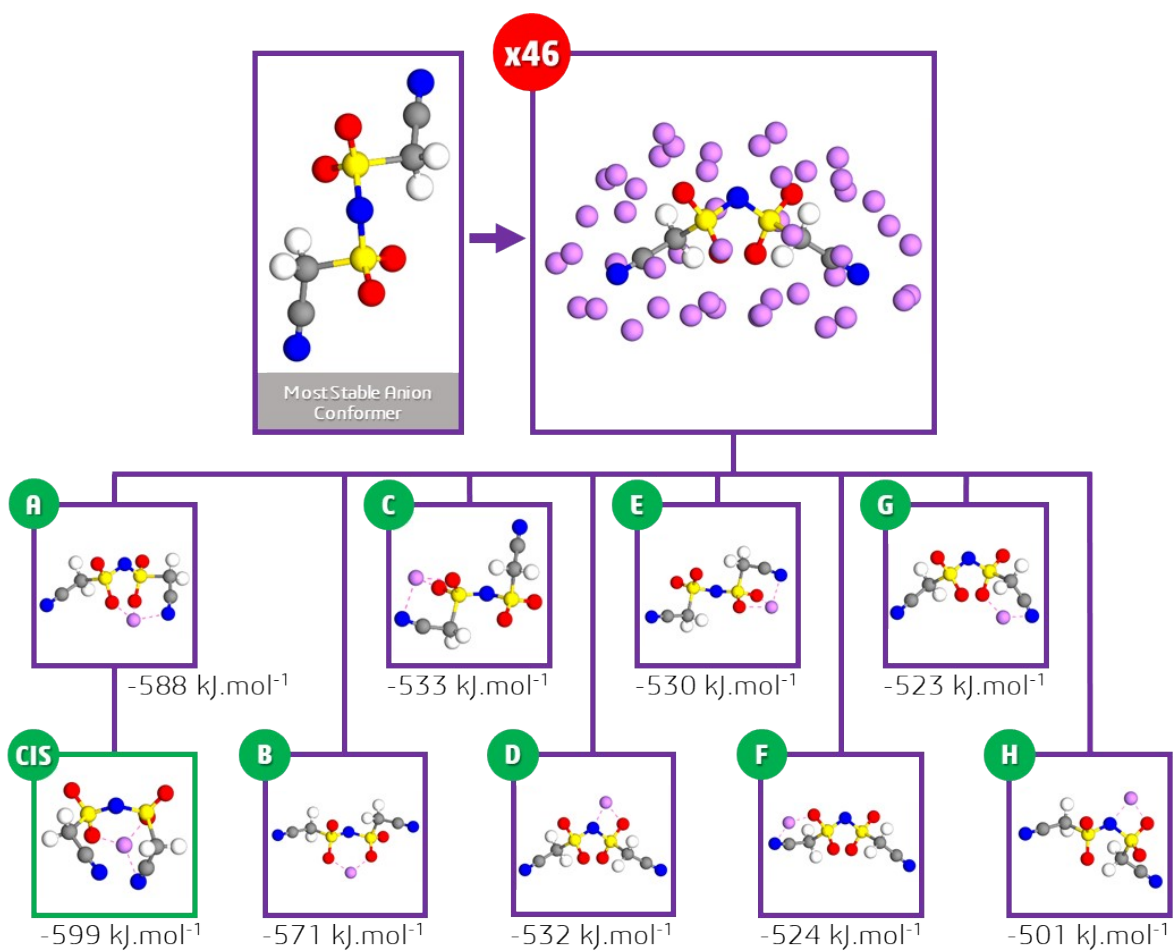

**Figure S11** – Conformer scan and lithiation site screening of  $S_8$  ( $CmSI^-$ ), depicting the 9 calculated unique adsorption sites and binding energies. The most stable site is outlined in green.

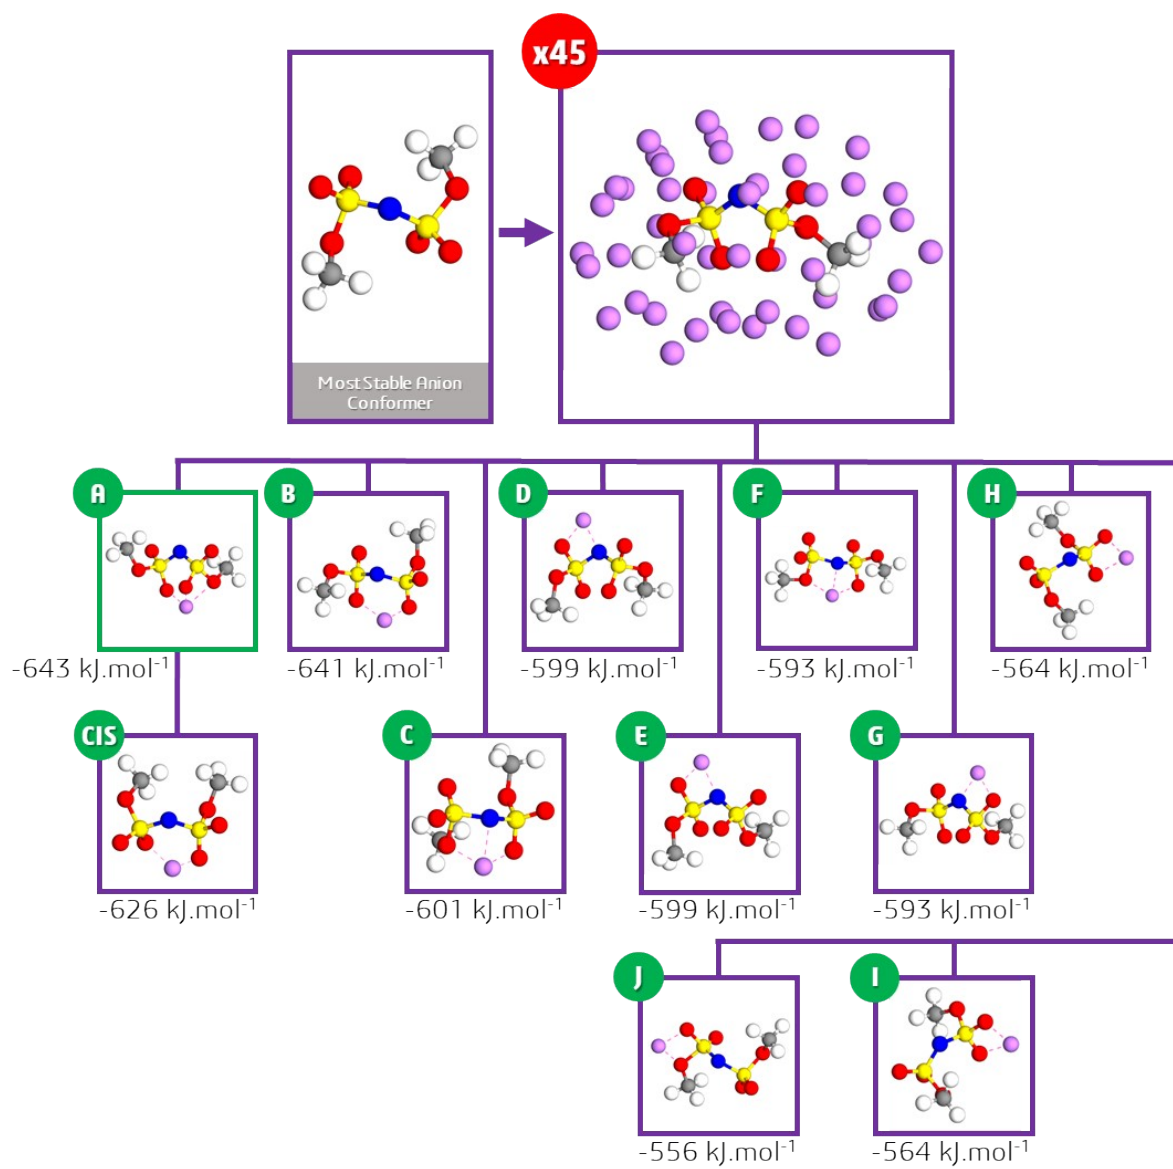

**Figure S12** – Conformer scan and lithiation site screening of S<sub>9</sub> (MOSI), depicting the 11 calculated unique adsorption sites and binding energies. The most stable site is outlined in green.



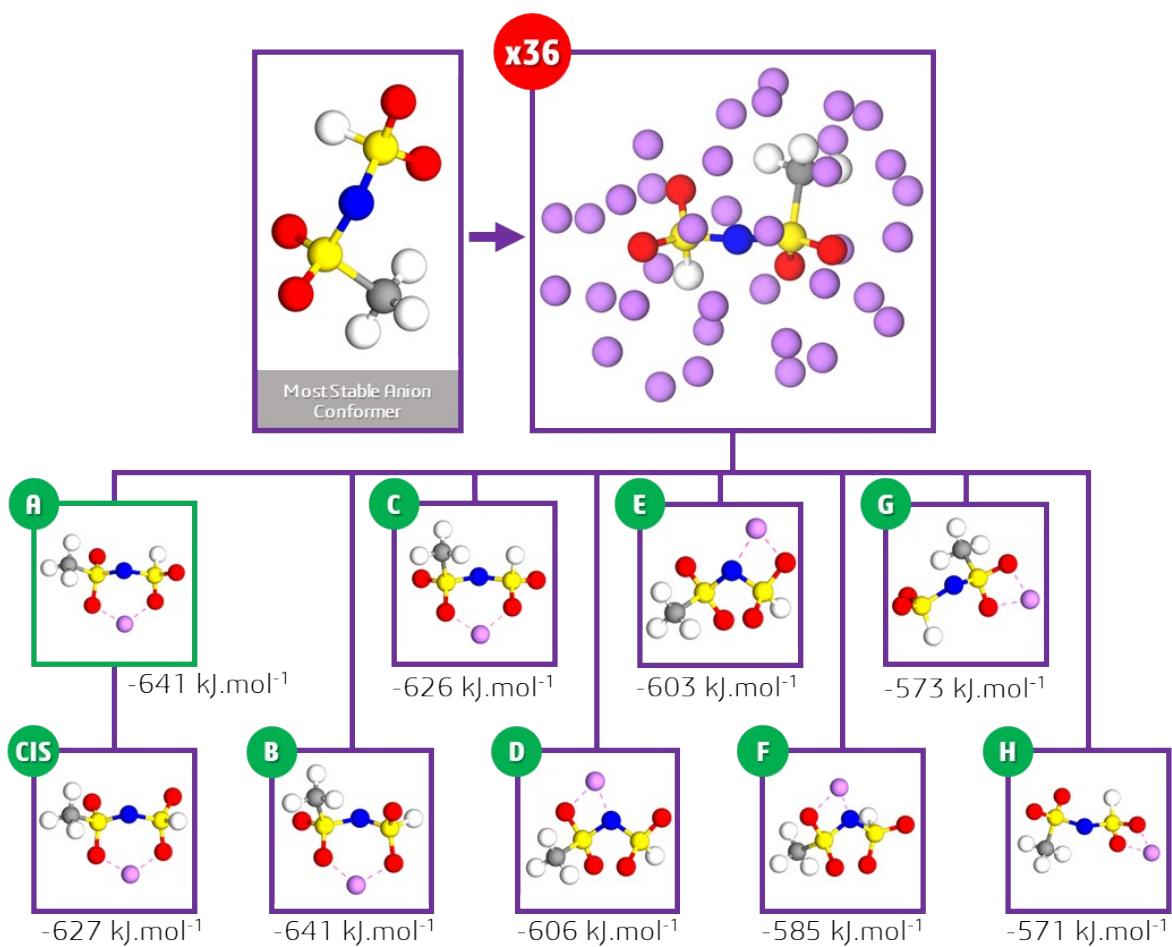

**Figure S13** – Conformer scan and lithiation site screening of A<sub>1</sub> (HMSI), depicting the 9 calculated unique adsorption sites and binding energies. The most stable site is outlined in green.

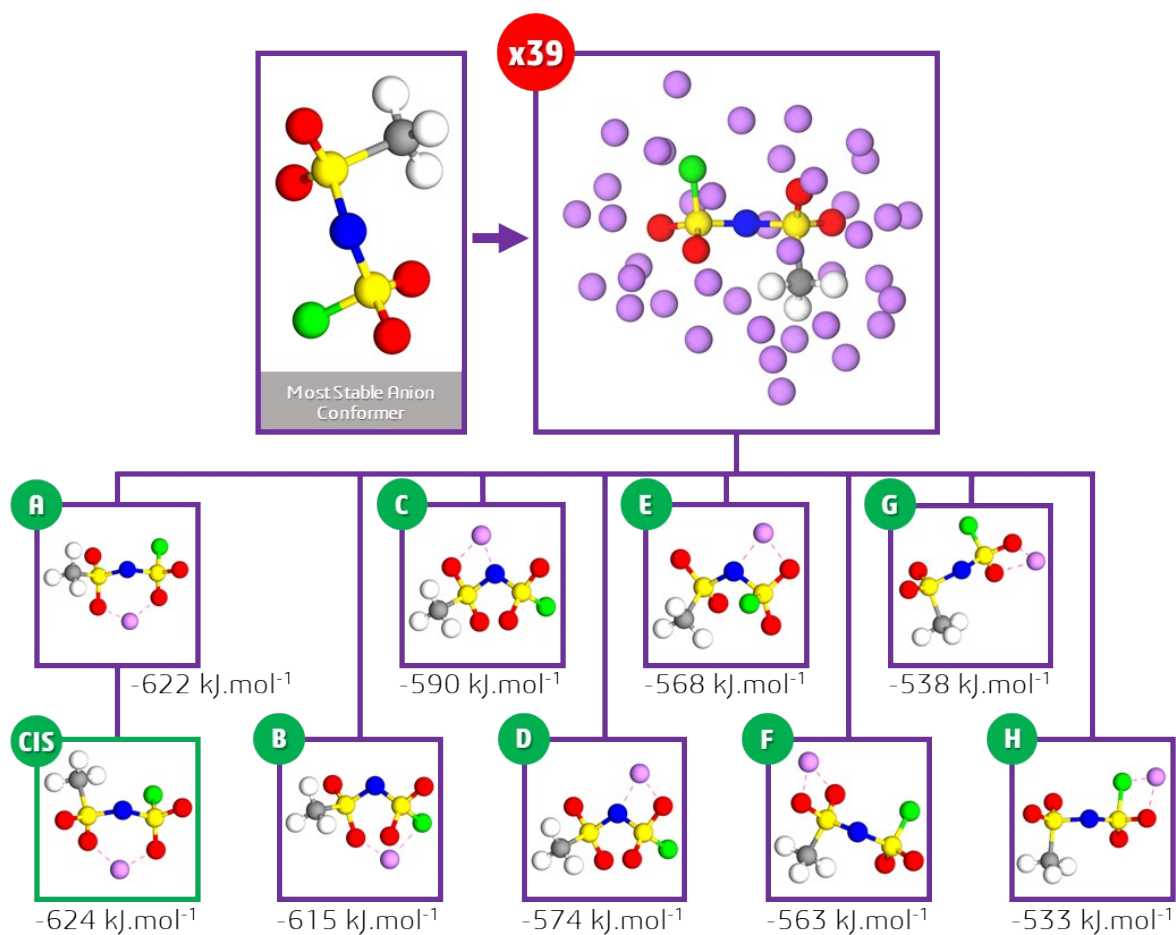

**Figure S14** – Conformer scan and lithiation site screening of A<sub>2</sub> (FMSI), depicting the 9 calculated unique adsorption sites and binding energies. The most stable site is highlighted in green.

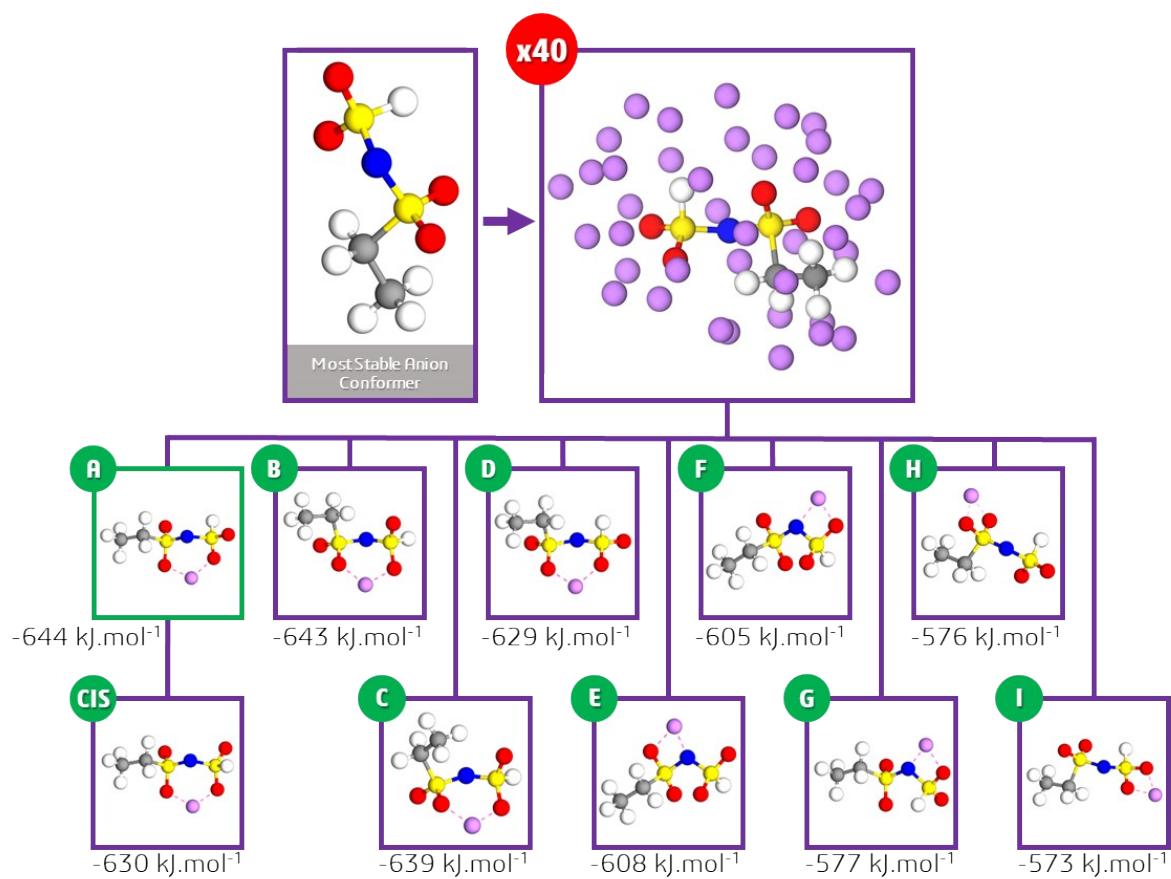

**Figure S15** – Conformer scan and lithiation site screening of  $A_3$  (HESI<sup>-</sup>), depicting the 10 calculated unique adsorption sites and binding energies. The most stable site is outlined in green.

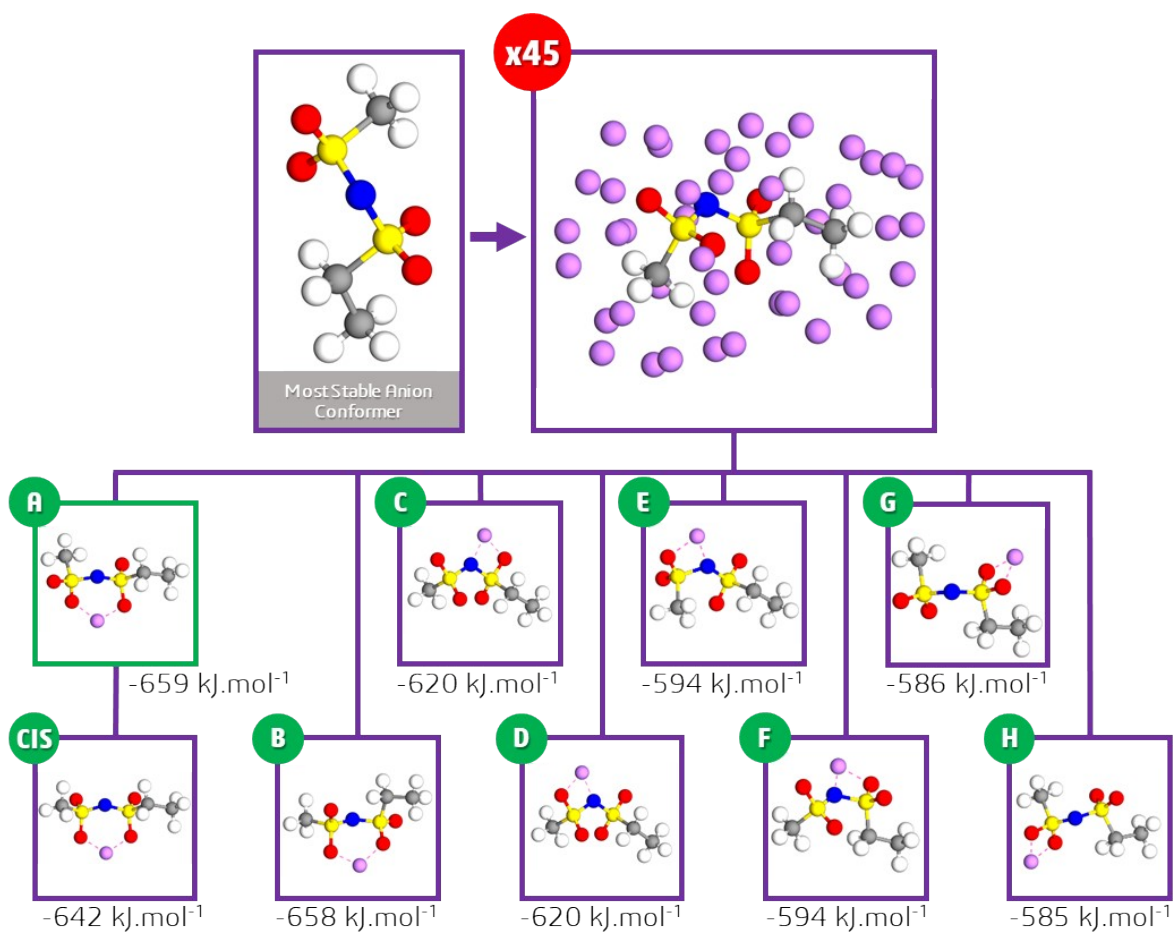

**Figure S16** – Conformer scan and lithiation site screening of A4 (MESI<sup>-</sup>), depicting the 9 calculated unique adsorption sites and binding energies. The most stable site is outlined in green.

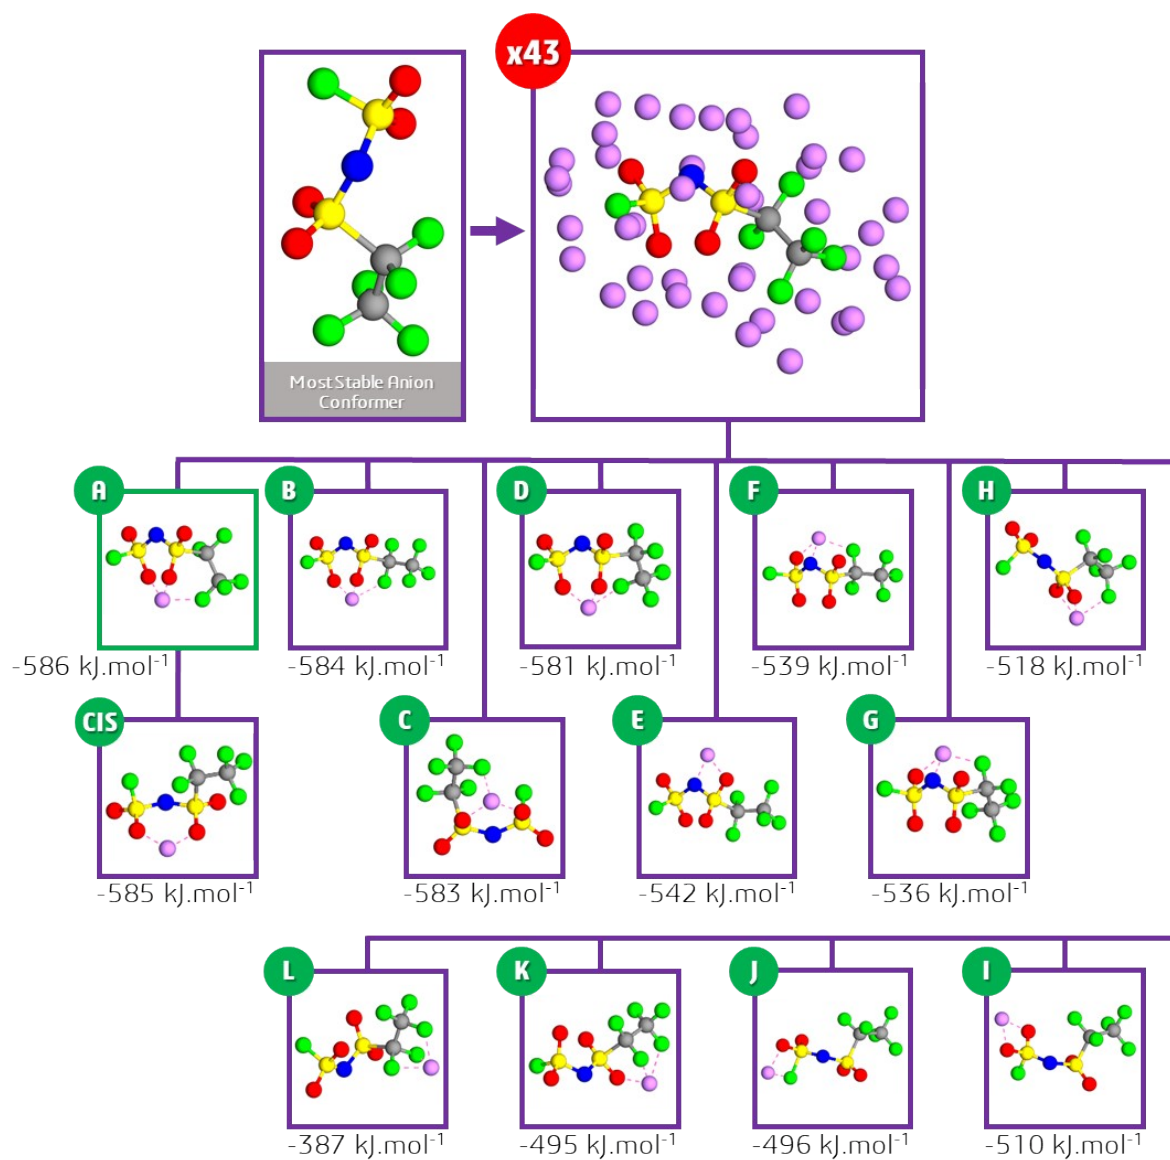

**Figure S17** – Conformer scan and lithiation site screening of A<sub>5</sub> (FPFESi<sup>-</sup>), depicting the 13 calculated unique adsorption sites and binding energies. The most stable site is outlined in green.

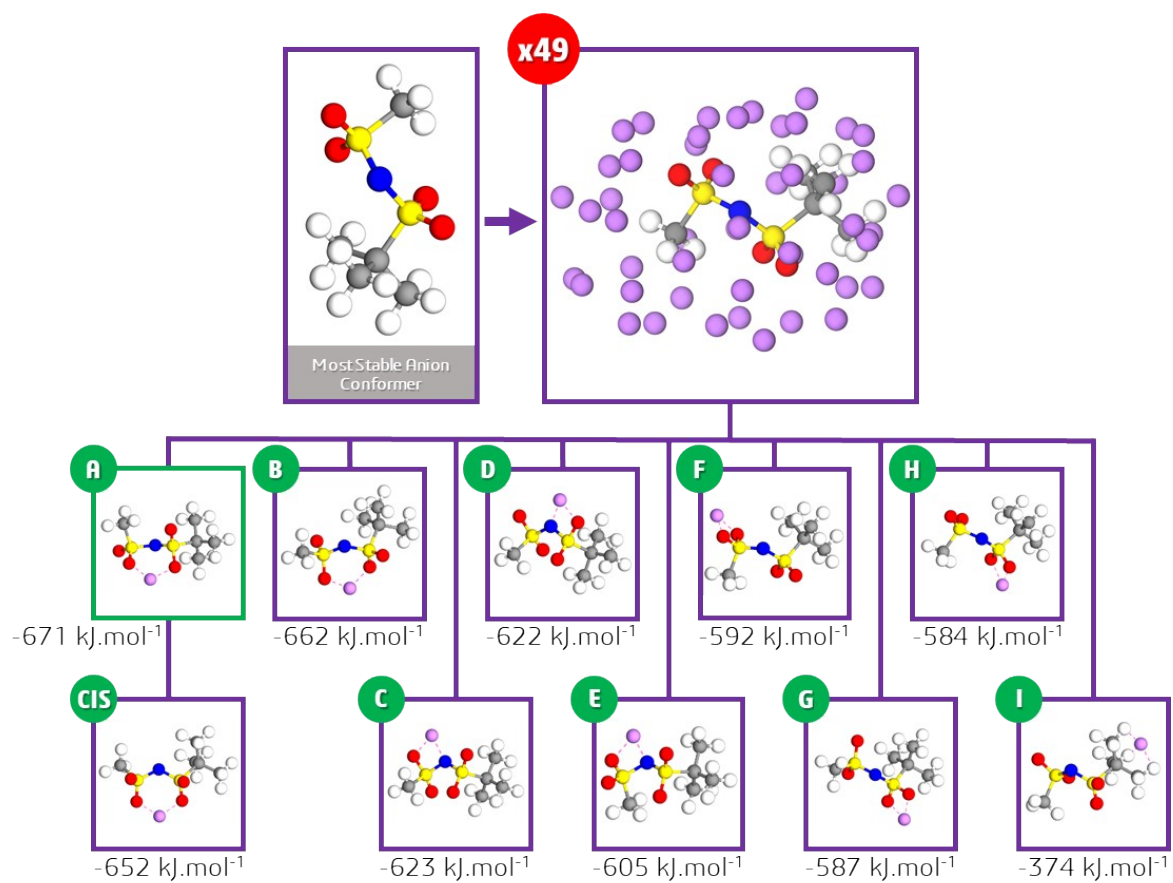

**Figure S18** – Conformer scan and lithiation site screening of A<sub>6</sub> (MTbSI), depicting the 10 calculated unique adsorption sites and binding energies. The most stable site is outlined in green.

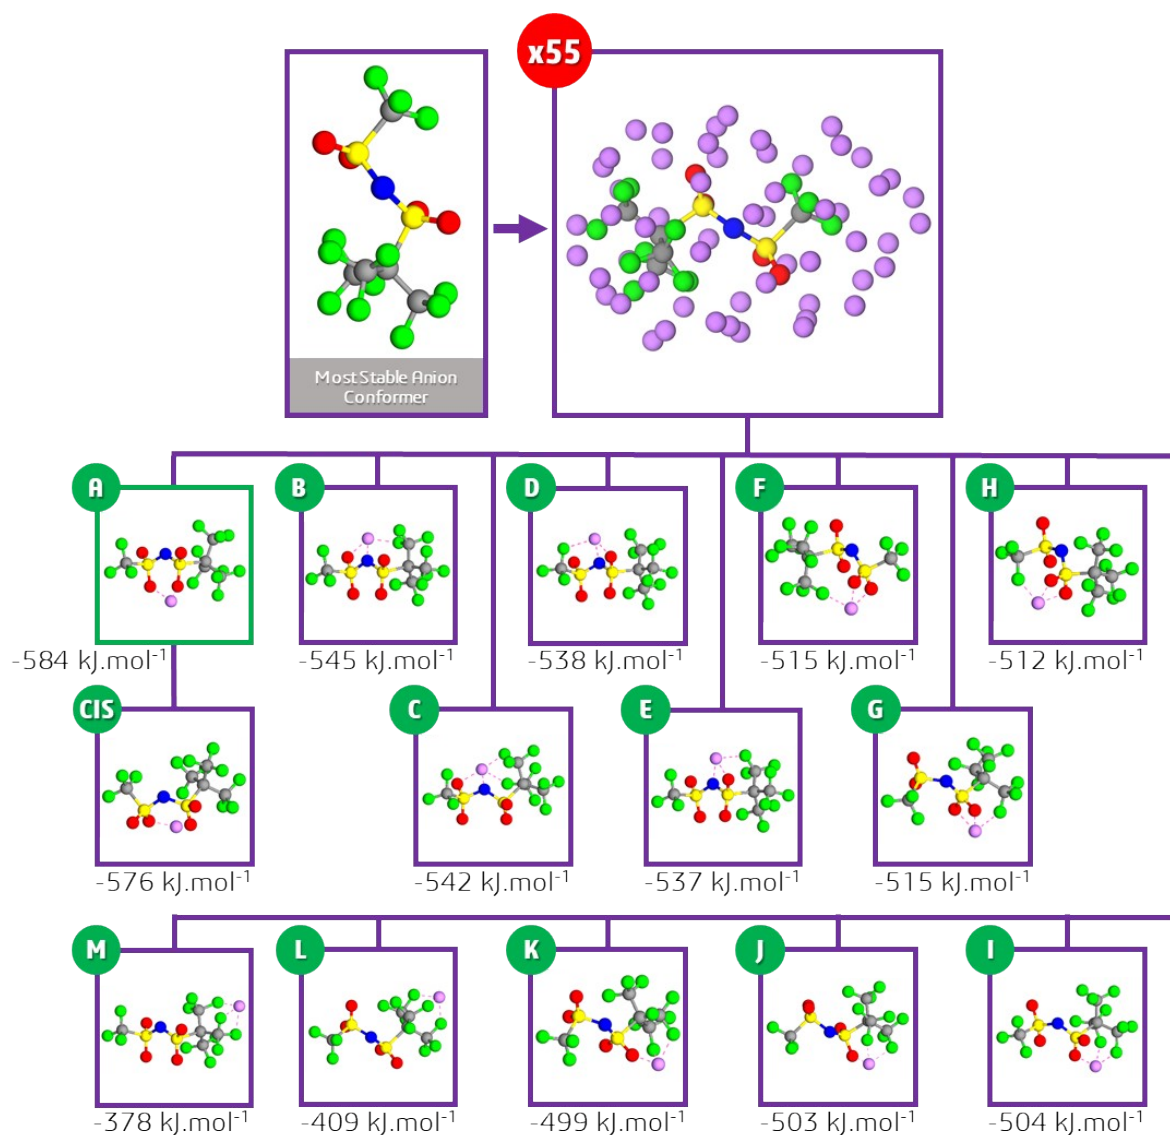

**Figure S19** – Conformer scan and lithiation site screening of A<sub>7</sub> (TFNFSI), depicting the 14 calculated unique adsorption sites and binding energies. The most stable site is outlined in green.

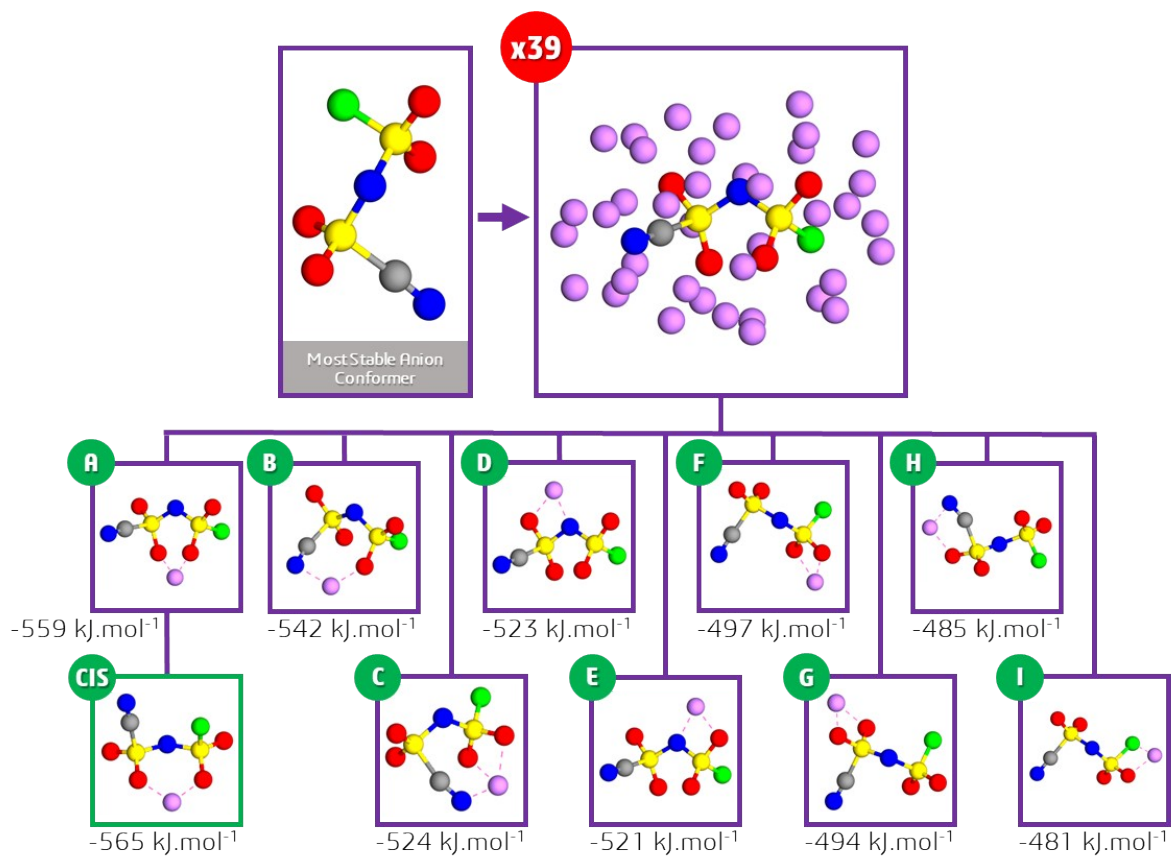

**Figure S20** – Conformer scan and lithiation site screening of A8 (FCSI), depicting the 10 calculated unique adsorption sites and binding energies. The most stable site is outlined in green.



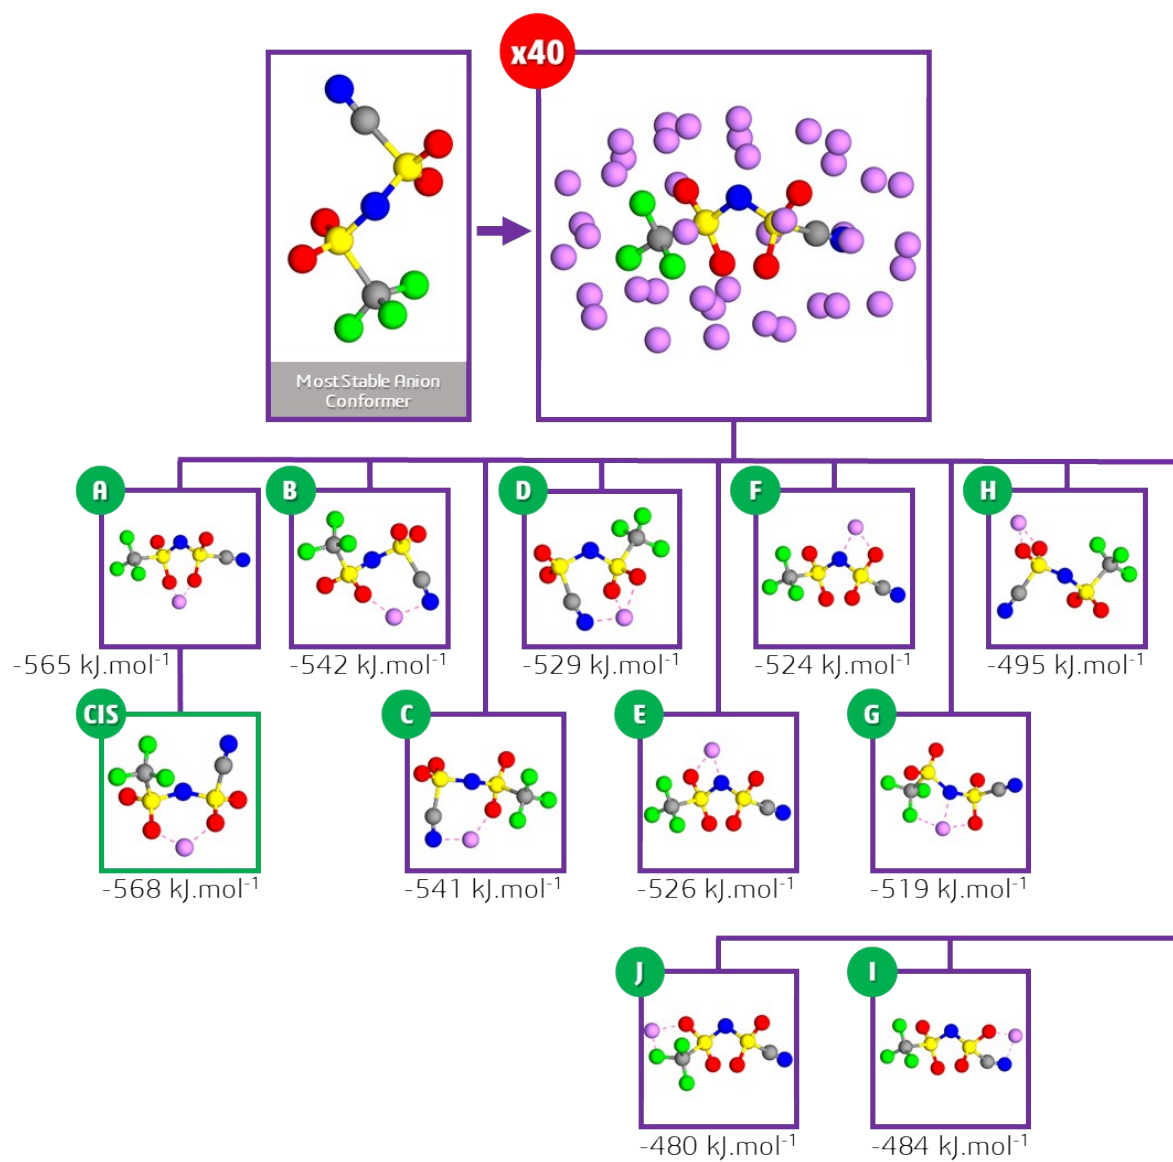

**Figure S21** – Conformer scan and lithiation site screening of  $A_9$  (TFCSI), depicting the 11 calculated unique adsorption sites and binding energies. The most stable site is outlined in green.

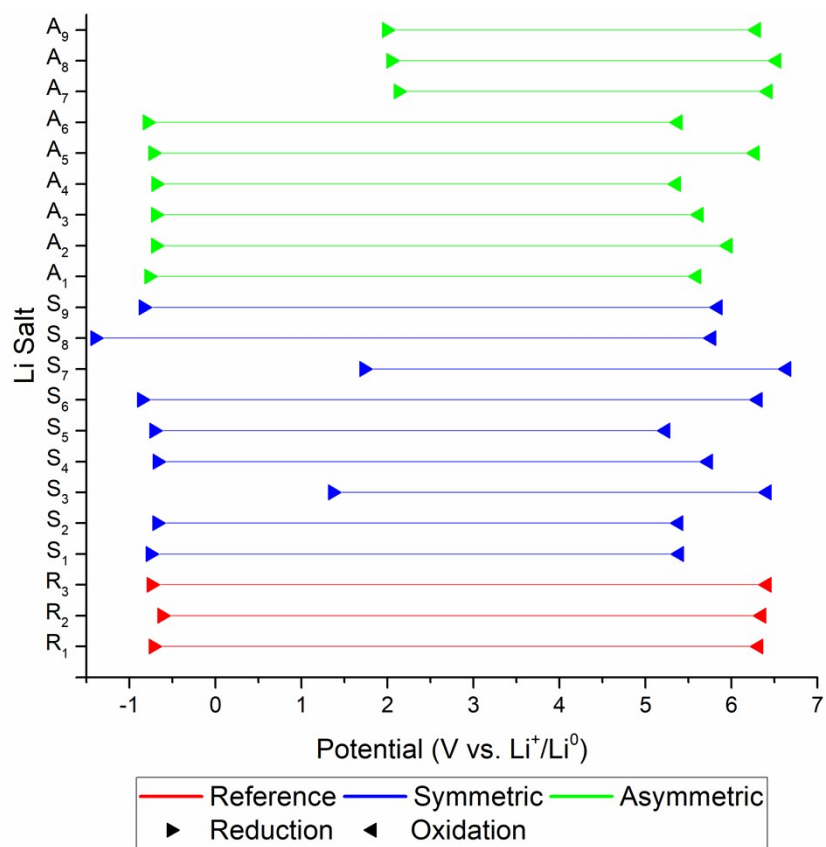

Figure S22 –Calculated electrochemical windows for the reference, symmetric and asymmetric salts.
